# Supplementary material
Source: MDPI journal article supplement (https://www.mdpi.com/2073-4468/11/1/6)
Supplement: s1 [file s1]

**Engineering an enhanced EGFR engager:  
Humanization of cetuximab for improved developability**

Dennis R. Goulet, Soumili Chatterjee, Wai-Ping Lee, Andrew B. Waight, Yi Zhu,  
Amanda Nga-Sze Mak

**Contents:**

Figure S1: Sequence identity matrices

Figure S2: SDS-PAGE of scFv-monoFc proteins

Figure S3: Cation exchange demonstrating formation of bispecific antibodies

| VH identity matrix -- all residues       |           |       |      |       |       |       |       |      |      |       |       |      |      |
|------------------------------------------|-----------|-------|------|-------|-------|-------|-------|------|------|-------|-------|------|------|
|                                          | Cetuximab | N85E  | H1   | H2    | H3    | H4    | H5    | H6   | H7   | H8    | H9    | H10  | H11  |
| Cetuximab                                |           | 99.2  | 78.2 | 84.9  | 84.9  | 85.7  | 86.6  | 86.6 | 87.4 | 85.7  | 84.9  | 84.9 | 84.0 |
| N85E                                     | 99.2      |       | 79.0 | 84.9  | 84.9  | 86.6  | 86.6  | 87.4 | 85.7 | 84.9  | 84.9  | 85.7 | 84.9 |
| H1                                       | 78.2      | 79.0  |      | 84.9  | 84.9  | 92.4  | 92.4  | 82.4 | 82.4 | 79.8  | 79.8  | 81.5 | 79.8 |
| H2                                       | 84.9      | 84.9  | 84.9 |       | 100.0 | 92.4  | 92.4  | 87.4 | 85.7 | 86.6  | 86.6  | 89.1 | 86.6 |
| H3                                       | 84.9      | 84.9  | 84.9 | 100.0 |       | 92.4  | 92.4  | 87.4 | 85.7 | 86.6  | 86.6  | 89.1 | 86.6 |
| H4                                       | 85.7      | 86.6  | 92.4 | 92.4  | 92.4  |       | 100.0 | 89.9 | 89.9 | 87.4  | 87.4  | 89.1 | 87.4 |
| H5                                       | 85.7      | 86.6  | 92.4 | 92.4  | 92.4  | 100.0 |       | 89.9 | 89.9 | 87.4  | 87.4  | 89.1 | 87.4 |
| H6                                       | 86.6      | 87.4  | 82.4 | 87.4  | 87.4  | 89.9  | 89.9  |      | 95.0 | 96.6  | 96.6  | 95.0 | 94.1 |
| H7                                       | 84.9      | 85.7  | 82.4 | 85.7  | 85.7  | 89.9  | 89.9  | 95.0 |      | 95.0  | 95.0  | 94.1 | 94.1 |
| H8                                       | 84.9      | 84.9  | 79.8 | 86.6  | 86.6  | 87.4  | 87.4  | 96.6 | 95.0 |       | 100.0 | 93.3 | 95.8 |
| H9                                       | 84.9      | 84.9  | 79.8 | 86.6  | 86.6  | 87.4  | 87.4  | 96.6 | 95.0 | 100.0 |       | 93.3 | 95.8 |
| H10                                      | 84.9      | 85.7  | 81.5 | 89.1  | 89.1  | 89.1  | 89.1  | 95.0 | 94.1 | 93.3  | 93.3  |      | 94.1 |
| H11                                      | 84.0      | 84.9  | 79.8 | 86.6  | 86.6  | 87.4  | 87.4  | 94.1 | 94.1 | 95.8  | 95.8  | 94.1 |      |
| VH identity matrix -- framework residues |           |       |      |       |       |       |       |      |      |       |       |      |      |
|                                          | Cetuximab | N85E  | H1   | H2    | H3    | H4    | H5    | H6   | H7   | H8    | H9    | H10  | H11  |
| Cetuximab                                |           | 98.9  | 70.1 | 79.3  | 79.3  | 80.5  | 80.5  | 81.6 | 79.3 | 79.3  | 79.3  | 79.3 | 78.2 |
| N85E                                     | 98.9      |       | 71.3 | 79.3  | 79.3  | 81.6  | 81.6  | 82.8 | 80.5 | 79.3  | 79.3  | 80.5 | 79.3 |
| H1                                       | 70.1      | 71.3  |      | 79.3  | 79.3  | 89.7  | 89.7  | 75.9 | 75.9 | 72.4  | 72.4  | 74.7 | 72.4 |
| H2                                       | 79.3      | 79.3  | 79.3 |       | 100.0 | 89.7  | 89.7  | 82.8 | 80.5 | 81.6  | 81.6  | 85.1 | 81.6 |
| H3                                       | 79.3      | 79.3  | 79.3 | 100.0 |       | 89.7  | 89.7  | 82.8 | 80.5 | 81.6  | 81.6  | 85.1 | 81.6 |
| H4                                       | 80.5      | 81.6  | 89.7 | 89.7  | 89.7  |       | 100.0 | 86.2 | 86.2 | 82.8  | 82.8  | 85.1 | 82.8 |
| H5                                       | 80.5      | 81.6  | 89.7 | 89.7  | 89.7  | 100.0 |       | 86.2 | 86.2 | 82.8  | 82.8  | 85.1 | 82.8 |
| H6                                       | 81.6      | 82.8  | 75.9 | 82.8  | 82.8  | 86.2  | 86.2  |      | 93.1 | 95.4  | 95.4  | 93.1 | 92.0 |
| H7                                       | 79.3      | 80.5  | 75.9 | 80.5  | 80.5  | 86.2  | 86.2  | 93.1 |      | 93.1  | 93.1  | 92.0 | 92.0 |
| H8                                       | 79.3      | 79.3  | 72.4 | 81.6  | 81.6  | 82.8  | 82.8  | 95.4 | 93.1 |       | 100.0 | 90.8 | 94.3 |
| H9                                       | 79.3      | 79.3  | 72.4 | 81.6  | 81.6  | 82.8  | 82.8  | 95.4 | 93.1 | 100.0 |       | 90.8 | 94.3 |
| H10                                      | 79.3      | 80.5  | 74.7 | 85.1  | 85.1  | 85.1  | 85.1  | 93.1 | 92.0 | 90.8  | 90.8  |      | 92.0 |
| H11                                      | 78.2      | 79.3  | 72.4 | 81.6  | 81.6  | 82.8  | 82.8  | 92.0 | 92.0 | 94.3  | 94.3  | 92.0 |      |
| VL identity matrix -- all residues       |           |       |      |       |       |       |       |      |      |       |       |      |      |
|                                          | Cetuximab | N85E  | H1   | H2    | H3    | H4    | H5    | H6   | H7   | H8    | H9    | H10  | H11  |
| Cetuximab                                |           | 100.0 | 70.1 | 83.2  | 81.3  | 85.0  | 83.2  | 86.0 | 85.0 | 82.2  | 79.4  | 82.2 | 84.1 |
| N85E                                     | 100.0     |       | 70.1 | 83.2  | 81.3  | 85.0  | 83.2  | 86.0 | 85.0 | 82.2  | 79.4  | 82.2 | 84.1 |
| H1                                       | 70.1      | 70.1  |      | 79.4  | 82.2  | 80.4  | 83.2  | 77.6 | 80.4 | 80.4  | 83.2  | 76.6 | 78.5 |
| H2                                       | 83.2      | 83.2  | 79.4 |       | 97.2  | 95.3  | 92.5  | 88.8 | 87.9 | 91.6  | 89.7  | 88.8 | 88.8 |
| H3                                       | 81.3      | 81.3  | 82.2 | 97.2  |       | 92.5  | 95.3  | 86.9 | 86.0 | 89.7  | 92.5  | 87.9 | 86.9 |
| H4                                       | 85.0      | 85.0  | 80.4 | 95.3  | 92.5  |       | 97.2  | 87.9 | 88.8 | 89.7  | 87.9  | 86.9 | 88.8 |
| H5                                       | 83.2      | 83.2  | 83.2 | 92.5  | 95.3  | 97.2  |       | 86.0 | 86.9 | 87.9  | 90.7  | 86.0 | 86.9 |
| H6                                       | 86.0      | 86.0  | 77.6 | 88.8  | 86.9  | 87.9  | 86.0  |      | 95.3 | 95.3  | 92.5  | 90.7 | 90.7 |
| H7                                       | 85.0      | 85.0  | 80.4 | 87.9  | 86.0  | 88.8  | 86.9  | 95.3 |      | 95.3  | 92.5  | 88.8 | 91.6 |
| H8                                       | 82.2      | 82.2  | 80.4 | 91.6  | 89.7  | 89.7  | 87.9  | 95.3 | 95.3 |       | 97.2  | 93.5 | 90.7 |
| H9                                       | 79.4      | 79.4  | 83.2 | 89.7  | 92.5  | 87.9  | 90.7  | 92.5 | 92.5 | 97.2  |       | 93.5 | 89.7 |
| H10                                      | 82.2      | 82.2  | 76.6 | 88.8  | 87.9  | 86.9  | 86.0  | 90.7 | 88.8 | 93.5  | 93.5  |      | 91.6 |
| H11                                      | 84.1      | 84.1  | 78.5 | 88.8  | 86.9  | 88.8  | 86.9  | 90.7 | 91.6 | 90.7  | 89.7  | 91.6 |      |
| VL identity matrix -- framework residues |           |       |      |       |       |       |       |      |      |       |       |      |      |
|                                          | Cetuximab | N85E  | H1   | H2    | H3    | H4    | H5    | H6   | H7   | H8    | H9    | H10  | H11  |
| Cetuximab                                |           | 100.0 | 60.0 | 77.5  | 75.0  | 80.0  | 77.5  | 81.3 | 80.0 | 76.3  | 72.5  | 76.3 | 78.8 |
| N85E                                     | 100.0     |       | 60.0 | 77.5  | 75.0  | 80.0  | 77.5  | 81.3 | 80.0 | 76.3  | 72.5  | 76.3 | 78.8 |
| H1                                       | 60.0      | 60.0  |      | 72.5  | 76.3  | 73.8  | 77.5  | 70.0 | 73.8 | 73.8  | 77.5  | 68.8 | 71.3 |
| H2                                       | 77.5      | 77.5  | 72.5 |       | 96.3  | 93.8  | 90.0  | 85.0 | 83.8 | 88.8  | 86.3  | 85.0 | 85.0 |
| H3                                       | 75.0      | 75.0  | 76.3 | 96.3  |       | 90.0  | 93.8  | 82.5 | 81.3 | 86.3  | 90.0  | 83.8 | 82.5 |
| H4                                       | 80.0      | 80.0  | 73.8 | 93.8  | 90.0  |       | 96.3  | 83.8 | 85.0 | 86.3  | 83.8  | 82.5 | 85.0 |
| H5                                       | 77.5      | 77.5  | 77.5 | 90.0  | 93.8  | 96.3  |       | 81.3 | 82.5 | 83.8  | 87.5  | 81.3 | 82.5 |
| H6                                       | 81.3      | 81.3  | 70.0 | 85.0  | 82.5  | 83.8  | 81.3  |      | 93.8 | 93.8  | 90.0  | 87.5 | 87.5 |
| H7                                       | 80.0      | 80.0  | 73.8 | 83.8  | 81.3  | 85.0  | 82.5  | 93.8 |      | 93.8  | 90.0  | 85.0 | 88.8 |
| H8                                       | 76.3      | 76.3  | 73.8 | 88.8  | 86.3  | 86.3  | 83.8  | 93.8 | 93.8 |       | 96.3  | 91.3 | 87.5 |
| H9                                       | 72.5      | 72.5  | 77.5 | 86.3  | 90.0  | 83.8  | 87.5  | 90.0 | 90.0 | 96.3  |       | 91.3 | 86.3 |
| H10                                      | 76.3      | 76.3  | 68.8 | 85.0  | 83.8  | 82.5  | 81.3  | 87.5 | 85.0 | 91.3  | 91.3  |      | 88.8 |
| H11                                      | 78.8      | 78.8  | 71.3 | 85.0  | 82.5  | 85.0  | 82.5  | 87.5 | 88.8 | 87.5  | 86.3  | 88.8 |      |

**Figure S1:** Sequence identity matrices for cetuximab, aglycosylated cetuximab (N85E), and humanized cetuximab versions (H1-H11). The top panel shows the identity matrix of the entire VH domain, the second panel shows the identity matrix of VH framework regions (entire VH domain, except Kabat CDR residues), the third panel shows the identity matrix of the entire VL domain, and the bottom panel shows the identity matrix of the VL framework regions (entire VL domain, except Kabat CDR residues). Shading from green (maximum 100% identity) to red (minimum 60% identity) is used to facilitate comparison.

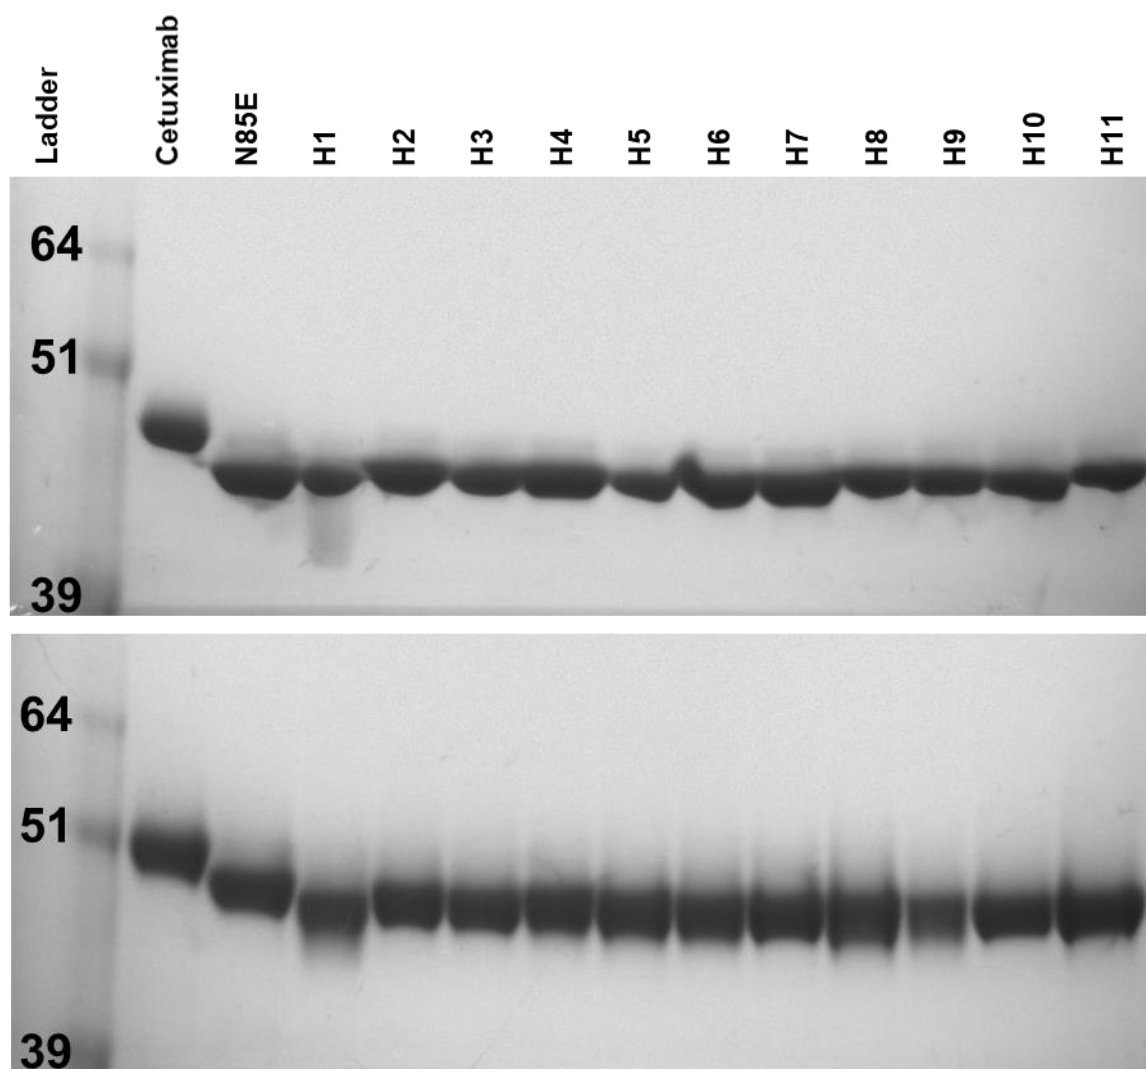

**Figure S2:** SDS-PAGE of purified scFv-monoFc proteins. Top panel shows non-reducing gel, and bottom panel shows reducing gel with 10 mM DTT.

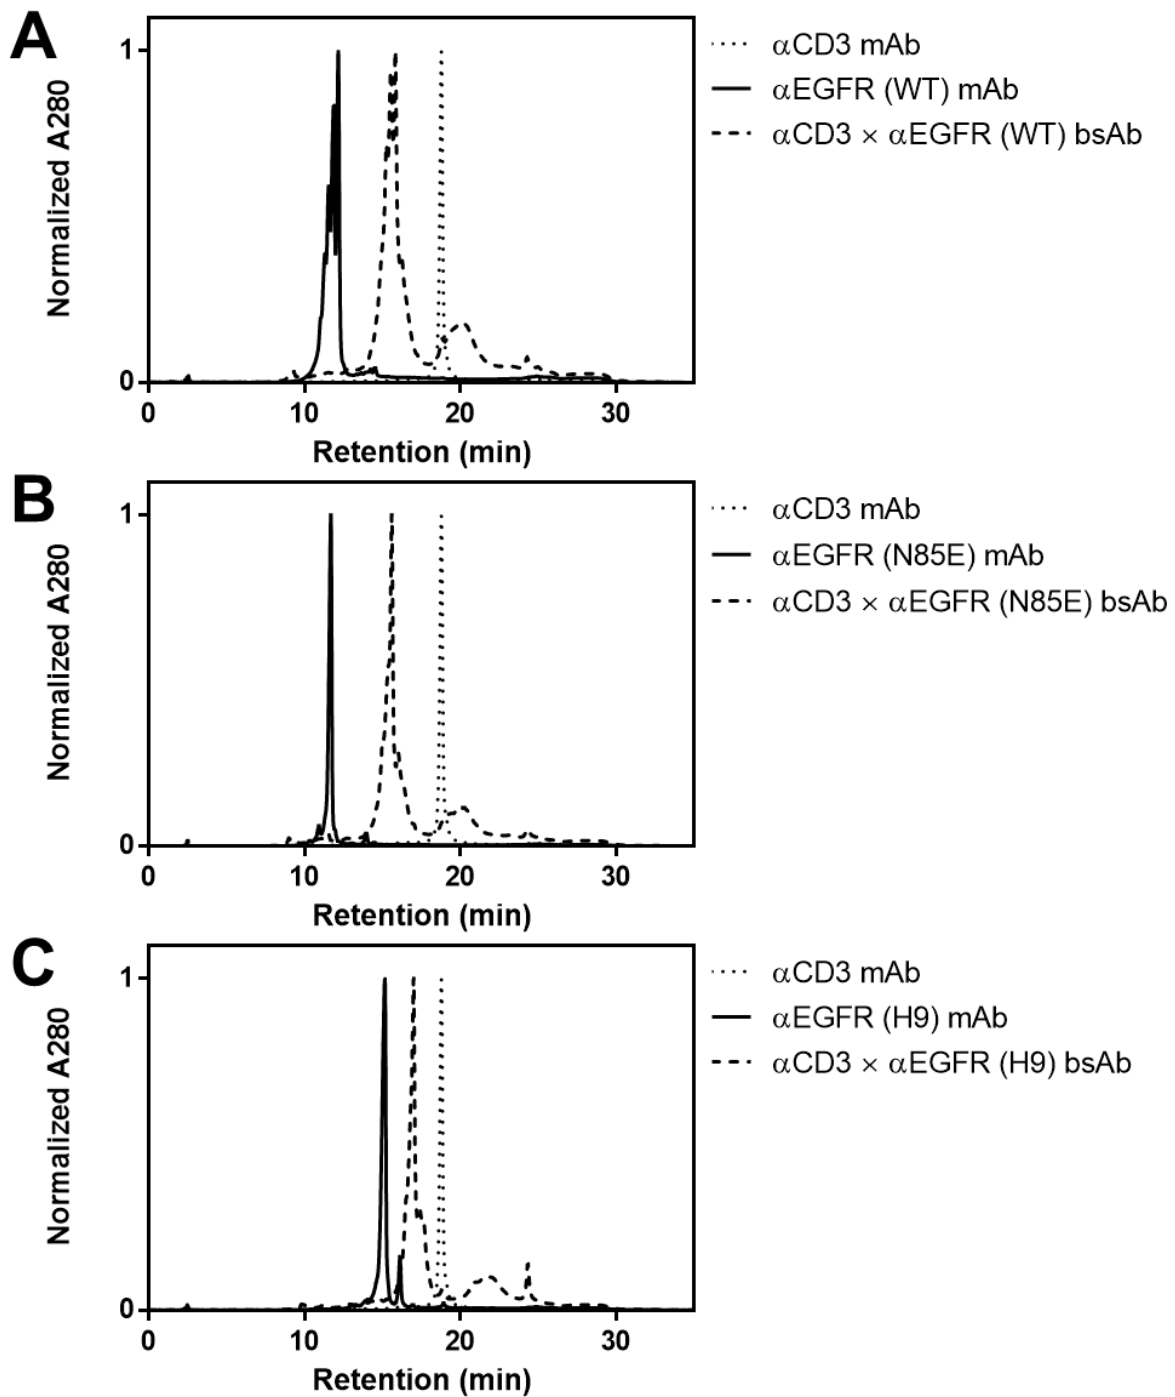

**Figure S3:** Cation exchange chromatography of parental  $\alpha$ CD3 and  $\alpha$ EGFR antibodies, as well as resulting  $\alpha$ CD3  $\times$   $\alpha$ EGFR bispecific antibodies, was used to demonstrate successful formation of bispecific antibodies. Comparison of  $\alpha$ CD3 mAb,  $\alpha$ EGFR mAb, and  $\alpha$ CD3  $\times$   $\alpha$ EGFR bispecific antibody is shown for wild-type cetuximab (A), aglycosylated (N85E) cetuximab (B), and humanized (H9) cetuximab (C).
